# Supplementary material
Source: publisher figshare collection journal article supplement (https://springernature.figshare.com/ndownloader/files/12443375)
Supplement: Supplementary file 1 [file 12443375]

## Sheet: Assay 1
Source Lab	Received data	Normalization	liftOver	Data Repository	Data Record Accession	Processed Data File (normalized & hg19)	Raw Data File
GH	normalized	NA	hg18 -> hg19	GEO	GSE103123	GSE103123_processed_matrix_tables.tar.gz > matrix_GH44.txt > matrix_GH60.txt	NA
FR-IC	normalized	NA	hg18 -> hg19	GEO	GSE103123	GSE103123_processed_matrix_tables.tar.gz > matrix_IC.txt	NA
FR-CLB	raw	median subtraction	hg19 received	GEO	GSE103123	GSE103123_processed_matrix_tables.tar.gz > matrix_CLB.txt	GSE103123_feature_extraction_files.tar.gz > FR…
SP	normalized	NA	hg19 received	GEO	GSE103123	GSE103123_processed_matrix_tables.tar.gz > matrix_SP.txt	NA
IT	normalized	NA	hg18 -> hg19	GEO	GSE103123	GSE103123_processed_matrix_tables.tar.gz > matrix_IT.txt	NA
VI	raw	median subtraction	hg19 received	GEO	GSE103123	GSE103123_processed_matrix_tables.tar.gz > matrix_VI.txt	GSE103123_CytoScanHD_Array_CEL.tar.gz
COL	raw	median subtraction	hg17/18 -> hg19	GEO	GSE103123	GSE103123_processed_matrix_tables.tar.gz > matrix_CO44_012700.txt > matrix_CO44_012750.txt > matrix_CO105.txt > matrix_CO1M.txt	GSE103123_feature_extraction_files.tar.gz > US…
COG	normalized	NA	hg18 -> hg19*	GEO	GSE103123	GSE103123_processed_matrix_tables.tar.gz > matrix_COG1.txt > matrix_COG2.txt > matrix_COG3.txt > matrix_COG4.txt > matrix_COG5.txt > matrix_COG6.txt	NA
JAP	normalized	NA	hg17 -> hg19	GEO	GSE103123	GSE103123_processed_matrix_tables.tar.gz > matrix_JAP.txt	NA
*not using liftover, but by replacing the chromosomal position by downloaded hg19 probe locations
